# Supplementary material
Source: MDPI journal article supplement (https://www.mdpi.com/2079-8954/10/5/158)
Supplement: s1 [file s1]

Archive with 3 entries (3 files):
- Supplement S1, Equation List.pdf
- Supplement S2, Parameter Assumptions.xlsx
- Supplement S3, Tests in a more disorganized community, v3.pdf
