# Supplementary material
Source: MDPI journal article supplement (https://www.mdpi.com/2079-8954/10/5/158)
Supplement: s1 [file s1 › Supplement S2, Parameter Assumptions.xlsx]

## Sheet: Constants
For PEER REVIEW: Systems
Article: How can a community pursue equitable health and well-being after a severe shock? Ideas from an exploratory simulation model
Authors: Bobby Milstein, Jack Homer, and Chris Soderquist
Date: September 13, 2022
Supplement 2: Parameter Assumptions & Sources
Parameter	Units	Value	Sources/Explanation
THRIVING, STRUGGLING, SUFFERING
Thriving fraction initial	fraction	0.55	Gallup Cantril life evaluation "Thriving" for US July-Dec 2017 ranged 48.3-65.1%; 55.1% on 12/24/17, 56.1% on 12/31/17. Also, 56.1% Aug 2019 and 55.3% Oct 2019. Use Gallup data for a specific city or county.
Exponent for thriving from VC	exponent	0.95	The extent to which changes in vital conditions, equity, and social support, respectively, would affect Thriving fraction. Estimating these parameters would require cross-sectional data from multiple counties on vital conditions, equity, social support, and thriving.
Exponent for thriving from equity	exponent	0.55
Exponent for thriving from social support	exponent	0.4
Suffering fraction initial	fraction	0.035	Gallup Cantril life evaluation "Suffering" for US July-Dec 2017 ranged 1.0-7.7%; 3.4% on 12/24/17, 3.5% on 12/31/17. Use Gallup data for a specific city or county.
Coefficient for urgent need from nonthriving	fraction	0.5	Urgent need (thus, suffering) rises and falls with non-thriving, but not in exact proportion. Analysis of weekly US Cantril data for 2017 shows a 34% correlation between suffering and non-thriving. We assume that half of suffering can be alleviated by reduction in non-thriving.
Avg life eval of thriving	0-10 index	8	In the Cantril assessment, Thriving reflects life evaluation in the 7-10 range; Suffering in the 0-4 range. Arora et al Health Affairs 2016 found the mean Life Eval across 3,092 counties to be 6.64 with a std dev of 0.42. With initial Thriving frac 55% and Suffering frac 3.5%, and with the avg life eval estimates here, the mean Life Eval is 6.55. A strong "2020 Shock" scenario leads to Thriving 4…
Avg life eval of struggling		5
Avg life eval of suffering		2
Avg YLL of struggling	years	3	Arora et al 2016 found that a 1 std dev (Cantril index 0.42) change in life eval corresponded to reductions in life expectancy of 0.51 yr for males and 0.76 yr for females; mean 0.64. A scenario in which Struggling increases from 39% to 50% and Suffering from 3.0% to 4.5% corresponds to a change in avg life eval of 0.42 (like Arora std dev). With the avg YLL estimates here, this causes a change i…
Avg YLL of suffering	years	20
Population size	people	330000	Size of population, assumed constant over the simulation period; used for calculating total years of life lost from struggling and suffering.
URGENT SERVICES CAPACITY
Adequacy of USC initial	fraction	0.6	Adequacy of USC describes the fraction of people with urgent needs who escape the suffering category (by virtue of receiving urgent services). Estimating this parameter would require data on unmet demand for urgent services; and/or direct estimation by local leaders. The model sets USC initial = Urgent need fraction initial * Adequacy of USC initial; where: Urgent need fraction initial = Sufferin…
USC erosion rate	1/year	0.25	The normal rate of USC erosion, e.g. due to turnover of service contracts or local budget constraints. Estimating this parameter would require longitudinal data on urgent services capacity.
VITAL CONDITIONS
Vital conditions index initial	fraction	0.8	A weighting of key vital conditions affecting well-being, measured as percentages, e.g. US county medians (CHR): not in poverty 83.7% (2012), have health insurance 82.3% (2011), not severe housing distress 86% (2009-13), some exercise past month 74.1% (2006-12), no smoking 78.3% (2006-12), on-time graduation of high schoolers 83.8% (2010-11). Use CHR data for a specific county.
VC erosion rate	1/year	0.03	The normal rate of vital conditions erosion, e.g. due to changes in the local economy or turnover of contracts supporting VC. Estimating this parameter would require longitudinal data on vital conditions.
EQUITY
Equity index initial	fraction	0.52	US Household Income Gini Index 2011-2017 = 0.48 (inequity). Use Census Gini data for a specific city or county.
Equity erosion rate	1/year	0.03	The normal rate of equity erosion, e.g. due to local economic trends and neighborhood change. Estimating this parameter would require longitudinal data on equity.
CIVIC MUSCLE & SOCIAL SUPPORT
Civic muscle index initial	fraction	0.5	Based on social associations per 10k popn (CHR): US median 12.6; US counties go up into the 20s: VA avg 22.1 (2017), Alexandria 23.2 (2014). Use CHR data for a specific county.
Exponent for CM building from equity	exponent	1	The extent to which changes in equity would affect potential for CM building. Estimating this parameter would require longitudinal data on CM and equity.
CM erosion rate normal	1/year	0.03	The normal rate of CM erosion, e.g. due to loss of leaders. Estimating this parameter would require longitudinal data on CM.
Social support index initial	fraction	0.8	Based on "have social-emotional support" 80.4% (CHR/BRFSS 2006-12). Use CHR data for a specific county.
SHOCKS & REBUILDING			(shock parameters approximating the effects of COVID-19 in 2020)
Start year of shock	year	1	Year that losses from shocks begin.
Duration of shock	years	1	Period over which losses from shock occur.
USC total loss from shock	fraction	0.003	Amount of USC index lost over the ramp duration (.003/.052 = 5.8% relative loss.)
VC total loss from shock	fraction	0.1	Amount of VC index lost over the ramp duration (.10/.80 = 12.5% relative loss.)
Equity total loss from shock	fraction	0.06	Amount of Equity index lost over the ramp duration (.06/.52 = 11.5% relative loss.)
CM total loss from shock	fraction	0	Amount of CM index lost over the ramp duration.
Time to ramp up assets for rebuilding	years	1	Time required to get gathered assets flowing and operational.
Duration of assets for rebuilding	years	11	Duration of gathered assets being in operation.
Asset gathering index	fraction	0.5	Rebuilding per year as a ratio to the loss from shock assuming a CM index of 0.5.
Asset threshold for outsourcing	fraction	0.5	If the asset gathering index is less than or equal to this threshold, no outsourcing will occur. Outsourcing will occur to the fractional extent that the first is greater than the second.
CM erosion multiplier from outsourcing	ratio	4	Outsourcing of rebuilding efforts leads to underuse of internal resources, leading to some loss of motivation and increased turnover for internal staff and volunteers. This ratio expresses the multiplier on CM erosion if 100% of rebuilding were outsourced.
ASSET ALLOCATION INITIAL FRACTIONS			(These decision parameters may be changed at 2-year intervals. The fraction allocted to urgent services is 1 minus the sum of the other three, ensuring that the four will always sum to 100%.)
Frac of CM allocated to VC building initial	fraction	0.3	Fraction of civic muscle and assets allocated to building VC.
Frac of CM allocated to Equity building initial	fraction	0.15	Fraction of CM/assets allocated to building Equity.
Frac of CM allocated to CM building initial	fraction	0.15	Fraction of CM/assets allocated to building CM itself.
SCORE WEIGHTS
Score weight on thriving	weight	1	Score weight on Thriving subscore. Thriving subscore expresses percentage change in thriving index at year 12 (up to plus or minus 100%), relative to the value of thriving at end of shock.
Score weight on suffering	weight	0.85	Score weight on Suffering subscore. Suffering subscore expresses the percentage change in suffering at year 12 (up to plus or minus 100%), relative to the value of suffering at end of shock.
Penalty multiplier for negative score	ratio	2	Multiplies the thriving or suffering score component if it is negative.
